# Supplementary material for: Targeted capture and sequencing of Orientia tsutsugamushi genomes from chiggers and humans
Source: PubMed Central journal article supplement (PMC8164161; doi:10.1016/j.meegid.2021.104818), 2021-07
Supplement: mmc2.pdf [file mmc2.pdf]

## Supplementary Table

Elliott\_OTcapture\_fullmetadata.xlsx

Supplementary Table 1. Sequencing metadata for all samples, including sample type and location of collection.

## Supplementary Figures

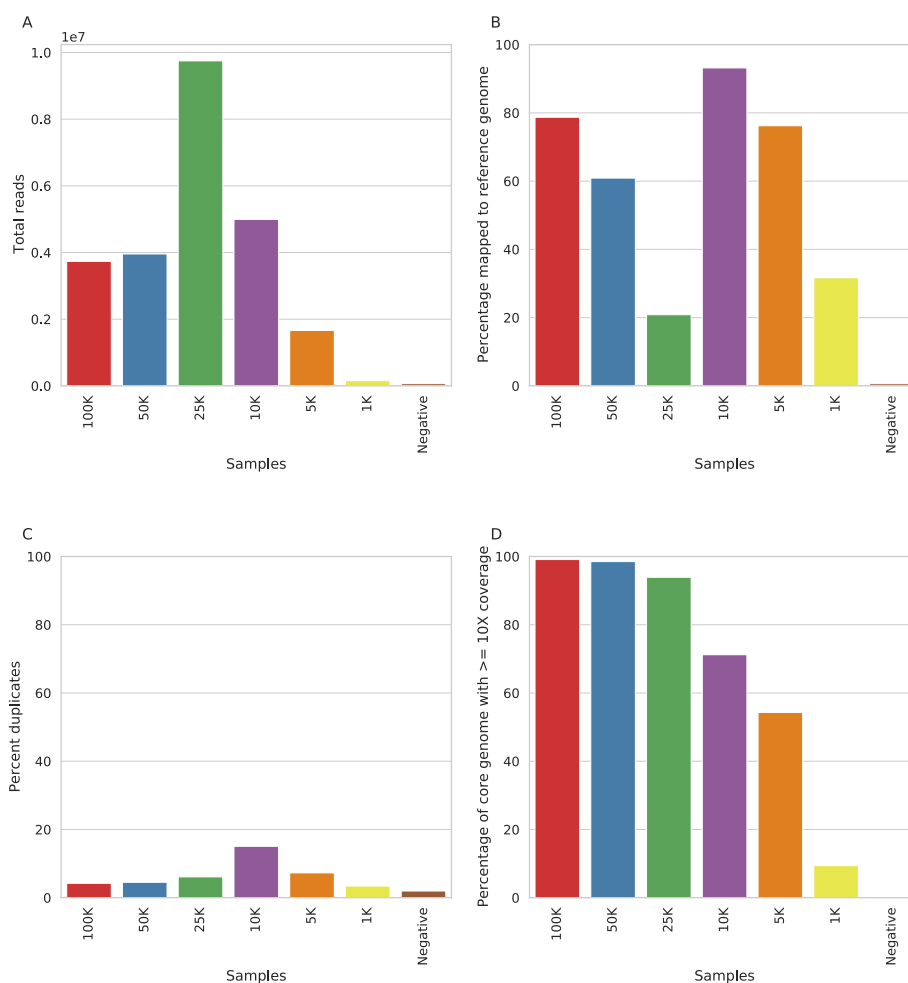

Supplementary Figure 1. Results from sequencing of spike-in control samples prepared using whole-genome amplification before library preparation showing a) total reads produced b) percentage of those reads which mapped to the reference genome c) percentage of the reads which were duplicates and d) the percentage of the core genome covered by 10 or more reads.

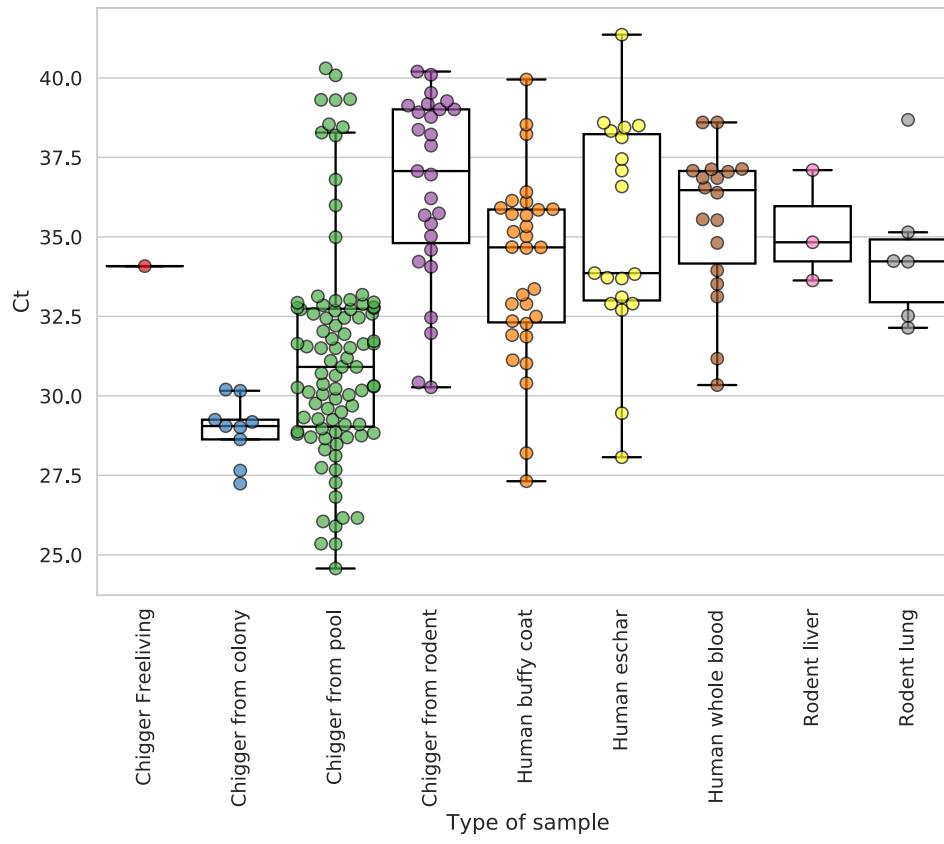

Supplementary Figure 2.  $C_t$  values plotted by type of sample.

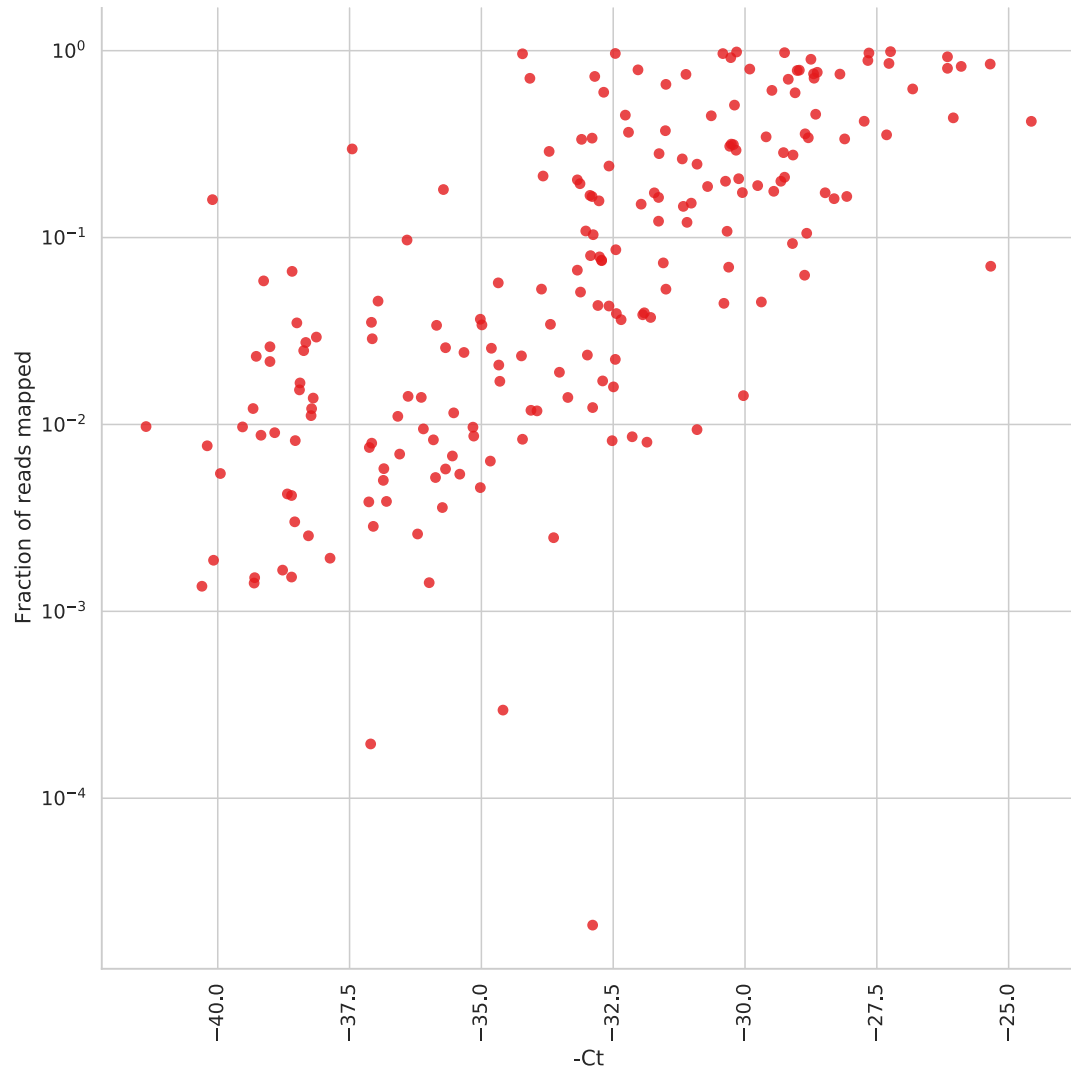

Supplementary Figure 3. Fraction of total reads mapped to the reference genome plotted against -Ct.

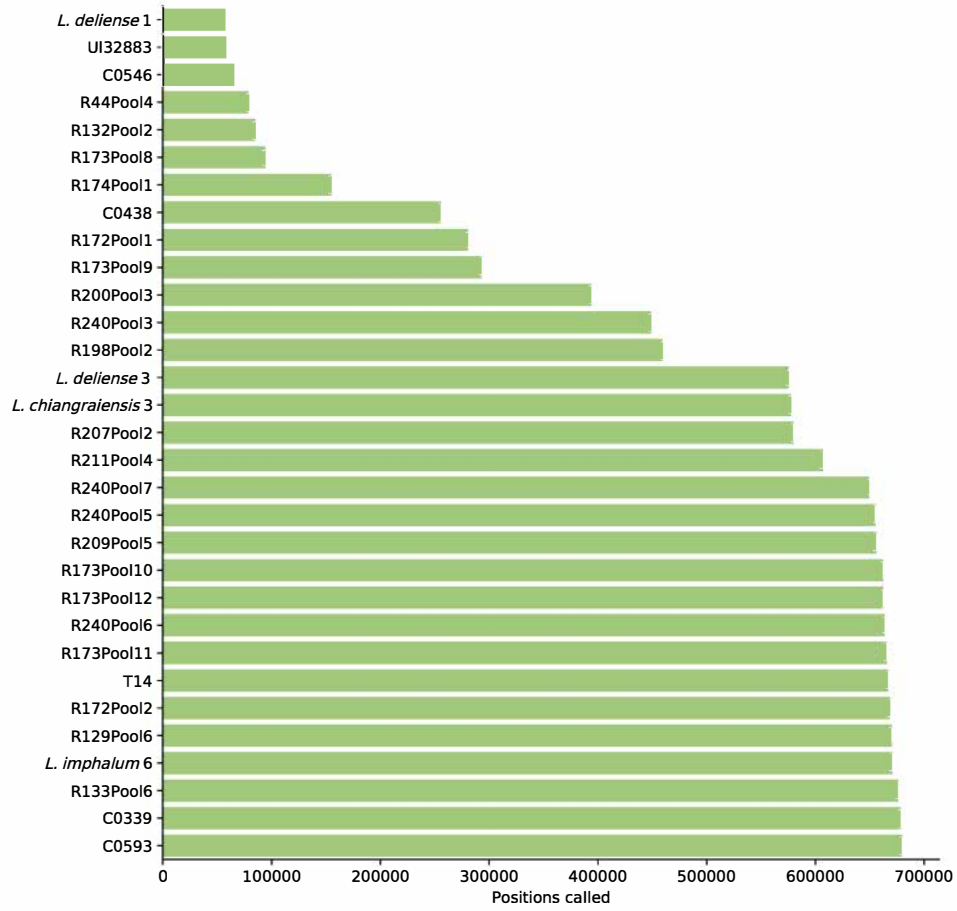

Supplementary Figure 4. Distribution of number of positions called in the 31 samples used for phylogenetic analysis.

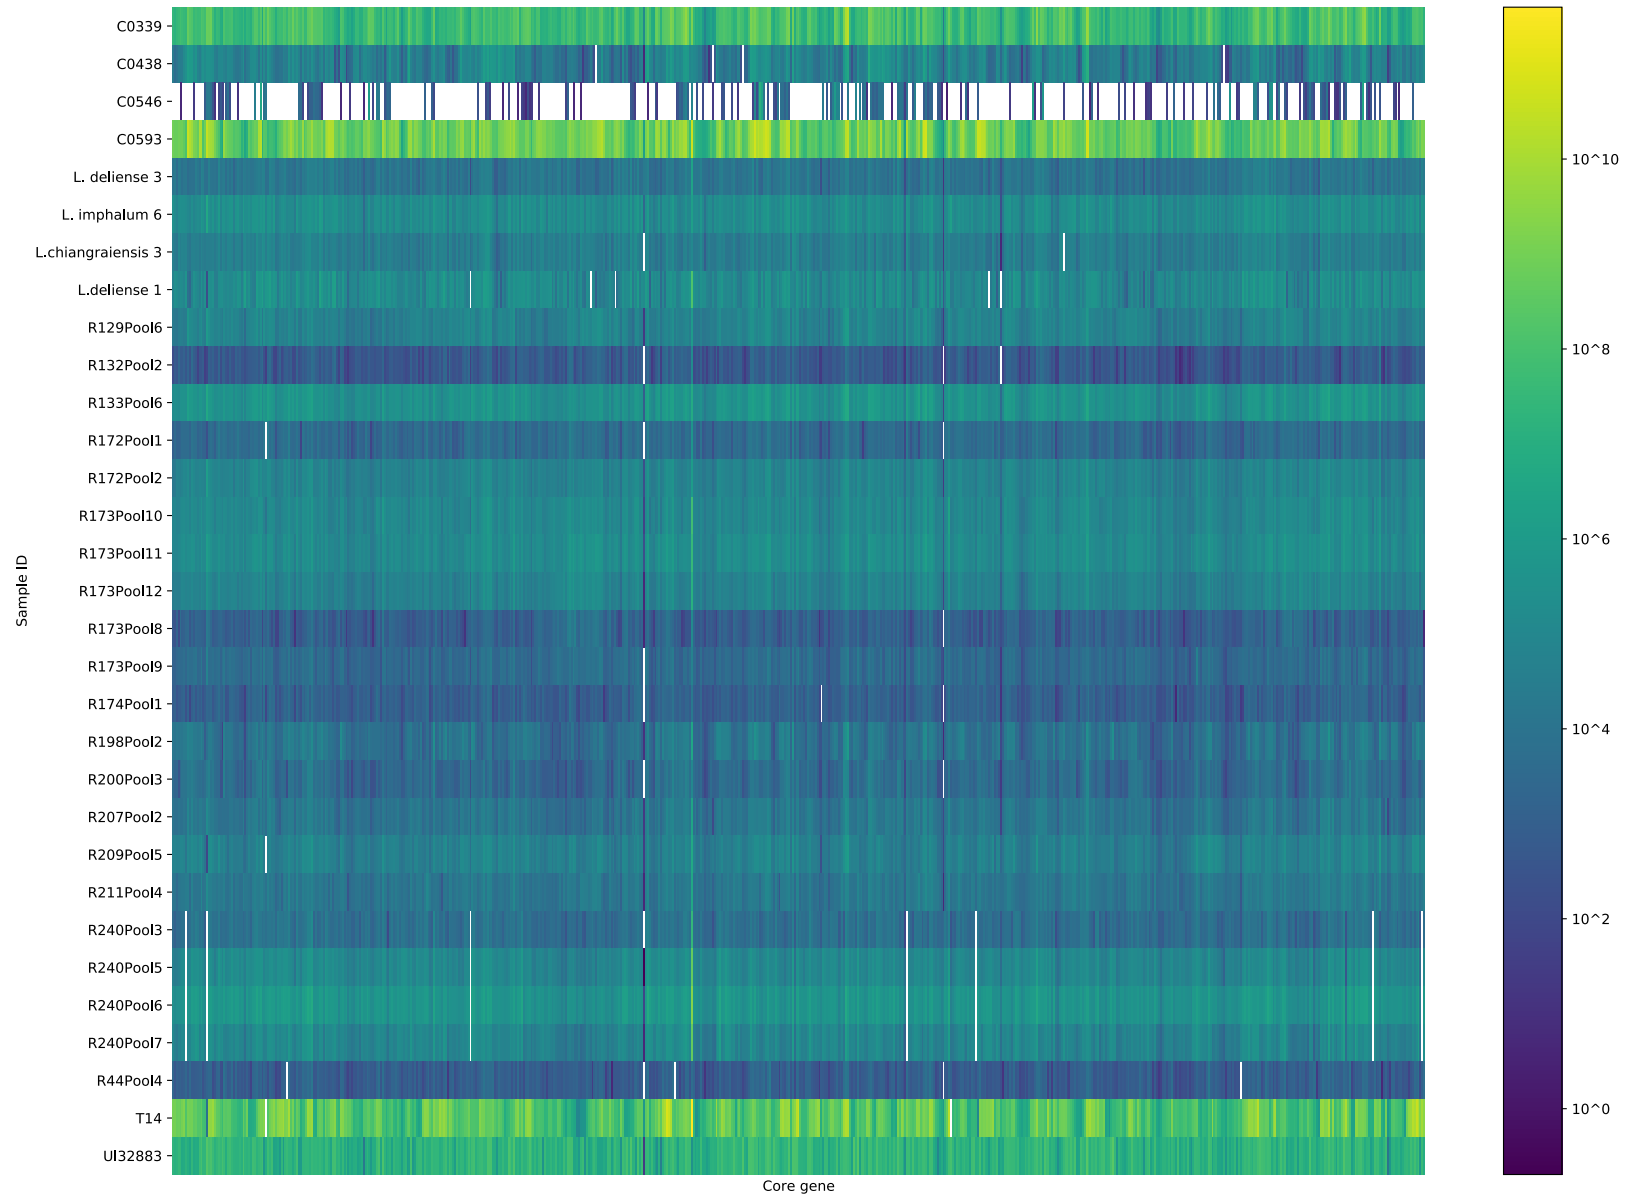

Supplementary Figure 5. Heatmap showing median coverage across each of the 657 core genes for the 31 samples used in phylogenetic analysis. The core genes are plotted in the order found in the UT76 reference genome. Genes with zero coverage are not coloured and appear as missing bars.
